1     **Sensory cheating: adversarial body**  
2             **patterns can fool a convolutional**  
3             **visual system during signaling**

4             Andres Laan<sup>1,\*</sup> and Gonzalo G. de Polavieja<sup>1,#</sup>

5                             May 19, 2018

6             <sup>1</sup> *Champalimaud Neuroscience Programme, Champalimaud Center for the*  
7             *Unknown, Lisbon, Portugal*

8  
9             \* [andres.laan@neuro.fchampalimaud.org](mailto:andres.laan@neuro.fchampalimaud.org)

10            # [gonzalo.polavieja@neuro.fchampalimaud.org](mailto:gonzalo.polavieja@neuro.fchampalimaud.org)

11     **Abstract:**

12     Animals often assess each other by paying special attention to signals, which  
13     help to communicate the quality of each individual. When there is a conflict  
14     of interest between the signaler and the receiver, then the signaler has an  
15     incentive to cheat by producing signals which exaggerate its apparent quality.  
16     One opportunity for cheating might be to rely on sensory illusions, but it has  
17     been difficult to study sensory cheating because we have lacked quantitative  
18     models of complex visual perception. Here we address this problem by taking  
19     advantage of recent advances in modeling visual brain areas as convolutional  
20     neural networks. Given these models, we use the technique of adversarial  
21     perturbations to show how sensory cheating can shape animal appearance  
22     while nevertheless resulting in an evolutionarily stable signaling system. In  
23     our simulations, animals typically evolve exaggerated color patterns which  
24     might be analogous to the evolution of colorful body patterns in guppies.

25     **Introduction**

26     Convolutional neural networks (CNNs) have recently revolutionized the sci-  
27     entific understanding of image processing and perception [1]. CNNs now

28 form the core component of most modern image recognition software and  
29 are routinely used as data analysis tools across many domains. Unlike many  
30 previous generations of machine learning models, CNNs are unique because  
31 they consist of neuron-like elements and they may thus be viewed as candi-  
32 date models for explaining the workings of biological visual systems as well.  
33 Quantitative comparisons between neural recordings and CNNs have indeed  
34 found a close resemblance between neural activity patterns inside CNNs and  
35 the mammalian visual cortex [2, 3].

36 Improved quantitative models of visual perception may provide new ways  
37 to theoretically analyze previously intractable problems. Here we use CNN  
38 models to study the evolutionary stability of signaling in the presence of  
39 conflicts of interest [4]. Our focus will be on the paradigmatic example of  
40 aggressive signaling. During aggression, fighters display signals intended to  
41 induce their opponent to surrender without a fight [5]. Typically, the individ-  
42 ual who is of inferior fighting quality will be scared away by the higher quality  
43 individual because the higher quality individual can afford to produce more  
44 intense signals. Note that weak individuals theoretically have the option to  
45 cheat by somehow producing a more intense signal than the stronger oppo-  
46 nent. They are also motivated to do so because successful cheating would  
47 lead to easy access to mates and resources. The puzzle of signaling is to  
48 explain why cheating does not occur despite strong incentives to do so [4].

49 Classical models emphasize that such cheating cannot evolve if more in-  
50 tense signals carry with them a greater cost of production, which only high  
51 quality individuals are able to bare [6]. This is the standard argument in-  
52 voked to explain phenomena like the large and uneconomical eyes of the  
53 stalk-eyed flies or the peacock’s conspicuous tails[7].

54 However, the standard explanation can only be part of the answer, be-  
55 cause it does not examine stability against sensory cheating. Sensory cheat-  
56 ing entails a reshaping of the signal into a form which would make it appear  
57 more intense than it really is to the senses of the receiver. The animal would  
58 essentially use its own body as a canvas on which to craft a visual illusion.  
59 For example, a courting animal might modify its body pigmentation pattern  
60 to enhance its apparent height through the use of oriented vertical stripes [8]  
61 and subsequently reap the benefits of the illusion through enhanced mating  
62 success.

63 Many animals harness visual illusions in various contexts like camouflage,  
64 escape and predator deterrence [9]. A paradigmatic case concerns animals  
65 that display large false eyes in order to appear more threatening to predators  
66 [10, 11]. Similar phenomena have been reported in the context of signaling  
67 as well. Bower birds, for example, are known to actively shape the visual  
68 environments of their mates to improve their own mating success [12, 13]. It

69 is therefore not inconceivable that in some species evolution might also shape  
70 body patterns so as to trick the sensory systems of the receivers.

71 In order to quantitatively study the process of sensory cheating, we study  
72 a signaling contest where the variable being estimated is body size. We  
73 use body size as our variable because larger animals typically win aggressive  
74 signaling contests and many animals actively display during conflict to signal  
75 their size [5]. We train CNNs to estimate the sizes of model birds placed in  
76 natural images. We then let the body pattern of the birds evolve in order  
77 to fool the networks and we analyze the emergent dynamics to see if the  
78 signaling system remains reliable throughout the process [14].

## 79 Results

80 Our study considers aggressive contests, where two individuals meet, assess  
81 each other's size and the smaller individual subsequently retreats. Under  
82 this scenario, any individual can improve its fitness if it can somehow modify  
83 its appearance to appear larger than it really is to the perceptual system of  
84 other animals.

85 To analyze this scenario, we first require a model of the size estimation  
86 perceptual system. We therefore compiled a catalog of natural images  
87 wherein we placed birds of various sizes. Then we trained a CNN to estimate  
88 the size of the bird in each image. After that, we let the birds evolve their  
89 appearance in ways that fooled the networks' perception.

90 We began by compiling a catalog of 4000 100 by 100 colored natural  
91 images. The raw images were downloaded from the natural scene statistics  
92 database [15] and 100 by 100 patches were extracted from the first 10 images  
93 in the database. We created ten copies of each image and then we placed  
94 inside these images the image of a model bird (**Figure 1** left panel). In  
95 order to model natural variability in bird appearance, the bird varied in  
96 height between 20 and 40 pixels, in rotation between -90 and 90 degrees and  
97 its location in the image was also sampled randomly. Further, a different  
98 sample of random noise was added to the body of the bird for each image  
99 and its intensity was also varied. We thus created a highly variable and  
100 non-trivially structured set of 40 000 images whose complexity was designed  
101 to mimic the complexity of the natural environment. Sample images of the  
102 resulting catalog can be seen in **Figure 1** left panel.

103 Next we trained a four-layered CNN to predict the size of the bird in  
104 each image (see Supplementary methods). Training the CNNs by gradient  
105 descent resulted in good predictive accuracy on both the training and the  
106 test set (**Figure 1** right panels). The CNNs were thus able to solve the

107 task of separating the birds from the backgrounds and measuring the size of  
108 the bird while ignoring irrelevant features like variation in orientation and  
109 intensity.

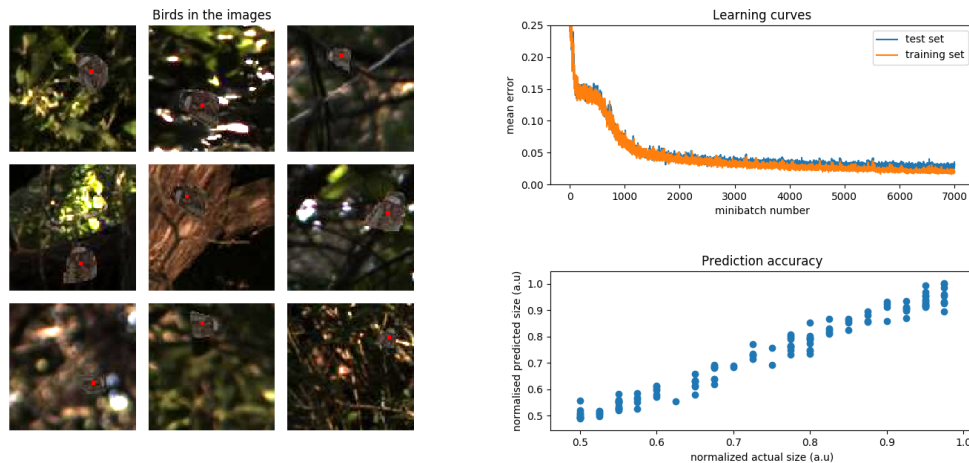

Figure 1: **Training the network.** Left panel: sample images from the catalog (the center of each bird is marked with a red dot for ease of viewing, the dots were not present in the images on which the CNN was trained). Top right panel: learning curves for the training and test set (batch size was 128 images). Bottom right: correspondence between the ground truth and the output of the trained network.

110 In order to model the evolution of body patterns, we adapted the tech-  
111 nique used to find adversarial examples in artificial neural networks [16].  
112 Briefly, we took three bird images of size 20, 30 and 40 pixels (small, medium,  
113 large) and for each image, we calculated the gradient of the output of the  
114 network with respect to each pixel of each image. This computation involved  
115 estimating the average gradient by taking a sample mean across many back-  
116 grounds, orientations and illumination levels (see **Supplementary meth-**  
117 **ods**). Then we performed gradient ascent to make the birds appear progres-  
118 sively larger over each iteration. The evolution of the largest bird's appear-  
119 ance can be seen in **Figure 2** on the left and the evolution of apparent size  
120 is depicted in **Figure 2** right panel.

121 The birds increase in size by accentuating their edges and decreasing the  
122 intensity of the center. They also evolve towards displaying unusual color  
123 patterns which are not encountered in the training set. It is noted that  
124 though the small, medium and large birds all considerably increase in appar-  
125 ent size, the relative ranking of the sizes of the three birds remains stable

126 throughout evolution and signaling thus remains reliable [14]. Reliability may  
127 be conserved because larger individuals are able to cheat more than smaller  
128 individuals, because they have more body pixels which they can manipulate.  
129 This may help larger individuals maintain their advantage over time.

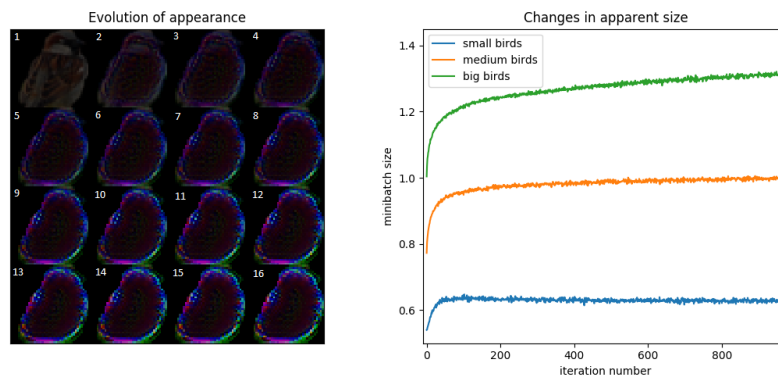

Figure 2: **Evolution of apparent size.** Left panel: changes in the appearance of the largest bird over time. Time is marked by numbers on the panels, each panel is separated from its predecessor by 60 iterations. Right panel: evolution of apparent size for the small, medium and large bird. Note that all birds considerably increase in size as time progresses but the relative ranking of the sizes nevertheless remains stable.

130 To establish the suitability of our methods for the study of biological  
131 signaling, we further tested whether our conclusions were robust to variation.  
132 In biological systems, the cheaters may need to be able to fool multiple  
133 networks, since individual brains are known to vary [17]. Though most brains  
134 are expected to produce similar outputs for similar inputs, they may be  
135 achieving this feat in slightly different ways because internal connections will  
136 vary somewhat due to factors like variability in brain development and early  
137 visual environment. One way to simulate the variability would be to train  
138 many different neural networks from different initial weight values and with  
139 a different sequence of training examples.

140 We implemented this differential training process for five neural networks.  
141 We then evolved a bird against the first network and then examined how the  
142 findings generalized when the resulting body patterns were shown to the the  
143 four other networks. We found that examples developed against one network  
144 typically generalized to the other four networks (**Figure 3** top left). We  
145 further found that this conclusion held even if we changed the internal archi-  
146 tecture of the network when we showed birds evolved against a network using  
147 a relu non-linearity to a network using a hyperbolic tangent non-linearity as

148 shown in **Figure S1** left (hyperbolic tangent non-linearities could be viewed  
149 as more biologically realistic due to its saturating behavior which more closely  
150 mimics neuronal biophysics [18]). As expected, this conclusion did not hold  
151 true when the images were shown to an untrained neural network (**Figure**  
152 **S1** right).

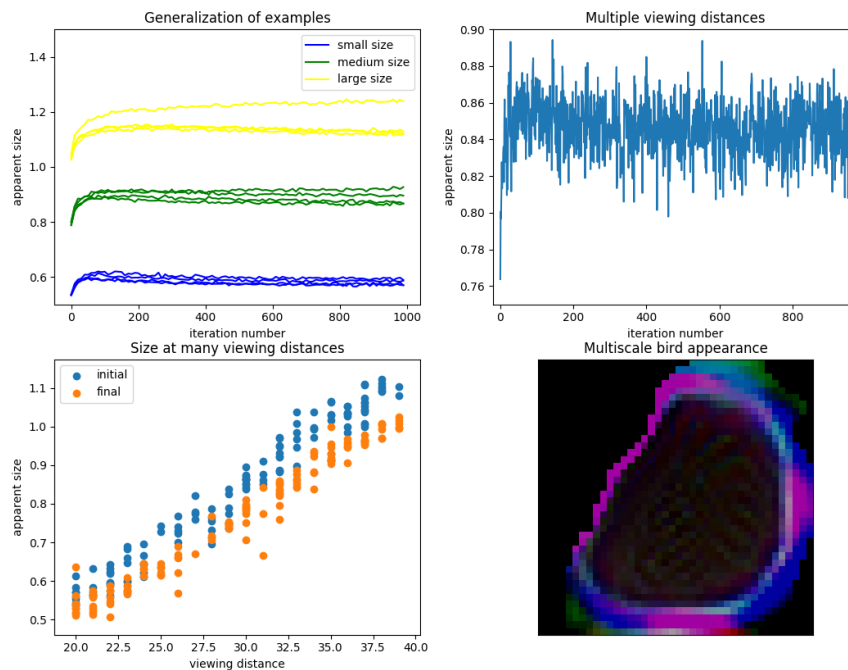

Figure 3: **Evolution of apparent size.** Top left: Birds evolved against one network are able to fool other networks which they did not encounter during evolution (each trace represents a separate network). Top right: evolution of mean apparent size when viewing distance varies. Bottom left: perceived size versus viewing distance at the beginning (orange) and end (blue) of evolution. The blue dots tend to lie above the red dots for all viewing distances indicating the ability of the mutant to robustly fool the CNN under many conditions. Bottom right: the final appearance of the large bird that fools CNNs at all distance.

153 We also tested whether our results are robust for all viewing distances.  
154 When viewed from an identical distance, smaller animals should always oc-  
155 cupy a smaller area on the retina than larger animals. However, signaling  
156 displays are often complex spatial maneuvers during which the viewing dis-

157 tance may vary [19]. A good quality visual system would presumably be able  
158 to distinguish between a big animal that is far away from a small animal that  
159 is close even if both images occupy similar sizes on its retina. Based on these  
160 concerns, we trained adversarial examples to be robust against variations in  
161 viewing angle (see **Supplementary methods**). Our system was able to find  
162 bird pigmentation perturbations which appeared larger than the original bird  
163 image at all viewing distances (**Figure 3** top right and bottom panels). We  
164 conclude that sensory cheating should be possible even against a visual sys-  
165 tem which integrates information about image size with information about  
166 inter-animal distances.

## 167 Discussion

168 We have demonstrated how convolutional neural networks could be applied  
169 to the study of the evolutionary stability of signaling. We suggest that fu-  
170 ture studies which examine the stability of signaling models should augment  
171 traditional low-dimensional game theory analysis with a high-dimensional  
172 analysis of signal form and natural image statistics [4, 6]. Our work shows  
173 that unless sensory cheating is ruled out, the stability of any equilibrium  
174 cannot be guaranteed.

175 Our approach made use of the technique of adversarial perturbations,  
176 which was originally developed as a method to find small perturbations that  
177 will cause machine classifiers to mis-classify an image [16]. Although these  
178 perturbations were initially believed to be relevant only in the context of  
179 artificial intelligence, recent research indicates that adversarial examples have  
180 a limited ability to confuse human observers as well [20]. Our study indicates  
181 that adversarial examples may also have further biological relevance in the  
182 evolution of signaling and body patterns. Future work could also attempt  
183 to apply these techniques to the study of segmentation systems and the  
184 evolution of camouflage [21].

185 Our work is not the first to recognize the usefulness of explicit cognitive  
186 models for the study of evolution. Pioneering theoretical work by Enquist  
187 and others used artificial neural networks like the multi-layer perceptron as  
188 a tool in the theoretical study of evolution [22]. This early work was of  
189 limited applicability because slow computers did not allow these systems  
190 to be trained on complex real world tasks. With the availability of fast  
191 modern hardware, it should become increasingly easy to design and probe  
192 the function of complex pattern recognition systems through an evolutionary  
193 lens.

194 One of the empirical findings of our work was that in the later stages

195 of evolution, the model birds evolved to display unusual colors. This is an  
196 outcome that likely occurs because adaptive systems are typically tuned to  
197 work accurately only on their training domain as they do not face selective  
198 pressure to correctly analyze out of domain signals. Since bright and pure  
199 colors lie outside the typical statistics of natural images, it is not surprising  
200 that these signals turned out to be effective at driving spurious signaling  
201 activity in the networks. These findings may have some parallels with the  
202 evolution of bright body colors in Trinidadian guppies [23]. When relived  
203 from predation pressure, Trinidadian guppies evolve to display bright colors  
204 for the purposes of increasing their attractiveness to potential mates. It may  
205 be the case that these bright body patterns function partly as adversarial ex-  
206 amples or hyper-stimuli that are particularly effective at driving the activity  
207 of the sexual quality assessment network of the fish brain.

208 Our work focused on the evolution of body patterns without considering  
209 the simultaneous evolution of the neural network used for assessment. We  
210 made this modeling choice because signaling equilibriums may be understood  
211 as Bourgeois strategies (where the asymmetry happens to be correlated but  
212 need not remain so throughout evolution) and no individual has an incentive  
213 to deviate from consensus assessments [24]. Since our modeling finds that  
214 signaling remains reliable, it could also serve as a useful model for scenar-  
215 ios where body pattern evolution is for some reason much more rapid than  
216 the evolution of the assessment network. For more complex scenarios like  
217 the study of sexual selection, this approximation may not remain valid and  
218 future work must find ways to extend our methods to take into account the  
219 aforementioned complexities [14].

220 Finally, it will be interesting to study if certain body patterns or brain  
221 architectures are less vulnerable to cheating. It might be expected that pure  
222 bright colors which are already unusual for a given environment and easy to  
223 separate from the background might be rather immune to cheating. Also,  
224 there may be other neural networks which utilize movement information or do  
225 a more complex segmentation that will prove more difficult to hack. Future  
226 work will need to explore these issues in more extensive detail.



## 227 **Supplementary materials**

### 228 **Supplementary figures**

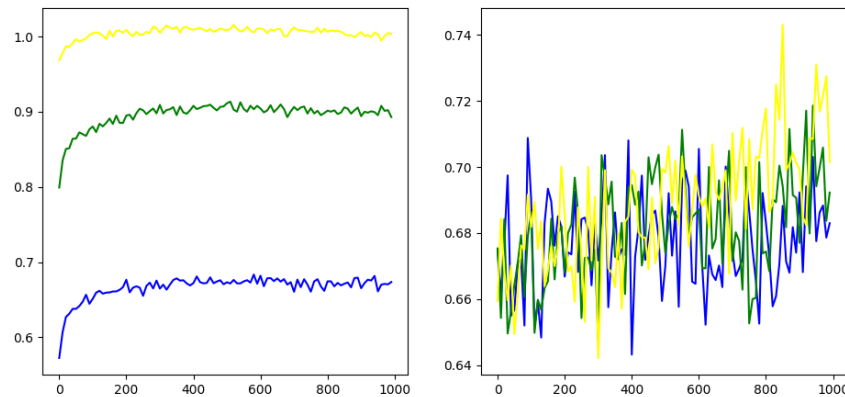

Figure 4: **Generalization of examples.** Left: Birds evolved against a relu network shown to a hyperbolic tangent network. Right: Birds evolved against a trained relu network shown to an incompletely trained (100 instead of 7000 mini-batches) relu network.

### 229 **Supplementary methods**

#### 230 **Details on neural networks**

231 We used 4 convolutional layers with relu non-linearities, each followed by a  
232 2-by-2 max pooling layer. All layers used 5x5 filters. Filter numbers by layer  
233 were 32, 64, 64, 64. The fully connected layer used 512 neurons. We trained  
234 the network using gradient descent on the mean squared error loss function  
235 with the Adam optimizer using a learning rate of  $10^{-4}$  with mini-batches of  
236 size 128. The training set consisted of 35 000 images from which mini-batches  
237 were sampled randomly. For the relu networks training process used 7000  
238 mini-batches. For the tanh non-linearity training took 200 000 mini-batches.  
239 Training was implemented in Tensorflow.

#### 240 **Adversarial examples**

241 During evolution, birds will evolve towards greater apparent size. The image  
242 of a bird can be regarded as a set of pixels. To predict how the birds will

243 evolve, we must predict which pixel changes would increase the expected  
244 apparent size of the bird. In other words, we must predict the gradient of  
245 the expected apparent size with respect to each pixel of the bird. In order  
246 to estimate the expected value of the gradient, we must average over all  
247 possible locations, orientations, backgrounds, noise perturbations, etc. We  
248 calculate the estimate using Monte Carlo sampling. We first embed the bird  
249 in 128 images, whose orientation, location, background, etc statistics are  
250 sampled from the same distribution as was used for generating the training  
251 set. For each image, we use standard Tensorflow procedures to estimate the  
252 gradient of the output (the estimated size) with respect to all the image  
253 pixels. Then we back-transform this gradient onto the bird image template  
254 by shifting and rotating the image such that the birds in all the images will  
255 line up exactly. The gradient estimate is the sample mean of these back-  
256 transformed gradients. Then we add the learning-rate weighted gradient  
257 onto the bird images to obtain a new bird image and repeat the procedure  
258 again. The same procedure was used to in the viewing distance invariant  
259 scenario, but there we also added an extra image scaling step to the back-  
260 transformation step to compensate for the fact that the size of the bird in  
261 each images varied depending on the viewing distance (the viewing distance  
262 was sampled uniformly at random between 20 and 40 units). Further details  
263 on the code are available from the authors on request and all code will be  
264 deposited at a public repository after publication of the manuscript.

## 265 References

- 266 [1] Krizhevsky A, Sutskever I, Hinton GE. Imagenet classification with  
267 deep convolutional neural networks. In: Advances in neural information  
268 processing systems; 2012. p. 1097–1105.
- 269 [2] Khaligh-Razavi SM, Kriegeskorte N. Deep supervised, but not unsuper-  
270 vised, models may explain IT cortical representation. PLoS computa-  
271 tional biology. 2014;10(11):e1003915.
- 272 [3] Kriegeskorte N. Deep neural networks: a new framework for modeling  
273 biological vision and brain information processing. Annual review of  
274 vision science. 2015;1:417–446.
- 275 [4] Smith JM, Harper D. Animal signals. Oxford University Press; 2003.
- 276 [5] Arnott G, Elwood RW. Assessment of fighting ability in animal contests.  
277 Animal Behaviour. 2009;77(5):991–1004.

- 278 [6] Grafen A. Biological signals as handicaps. *Journal of theoretical biology*.  
279 1990;144(4):517–546.
- 280 [7] Emlen DJ. *Animal weapons: the evolution of battle*. Henry Holt and  
281 Company; 2014.
- 282 [8] Thompson P, Mikellidou K. Applying the Helmholtz illusion to fash-  
283 ion: Horizontal stripes won't make you look fatter. *i-Perception*.  
284 2011;2(1):69–76.
- 285 [9] Kelley LA, Kelley JL. Animal visual illusion and confusion: the impor-  
286 tance of a perceptual perspective. *Behavioral Ecology*. 2013;25(3):450–  
287 463.
- 288 [10] De Bona S, Valkonen JK, López-Sepulcre A, Mappes J. Predator  
289 mimicry, not conspicuousness, explains the efficacy of butterfly eyespots.  
290 *Proc R Soc B*. 2015;282(1806):20150202.
- 291 [11] Stevens M, Hardman CJ, Stubbins CL. Conspicuousness, not eye  
292 mimicry, makes eyespots effective antipredator signals. *Behavioral Ecol-*  
293 *ogy*. 2008;19(3):525–531.
- 294 [12] Endler JA, Endler LC, Doerr NR. Great bowerbirds create theaters  
295 with forced perspective when seen by their audience. *Current Biology*.  
296 2010;20(18):1679–1684.
- 297 [13] Kelley LA, Endler JA. Illusions promote mating success in great bower-  
298 birds. *Science*. 2012;335(6066):335–338.
- 299 [14] Searcy WA, Nowicki S. *The evolution of animal communication: reli-*  
300 *ability and deception in signaling systems*. Princeton University Press;  
301 2005.
- 302 [15] Geisler WS, Perry JS. Statistics for optimal point prediction in natural  
303 images. *Journal of Vision*. 2011;11(12):14–14.
- 304 [16] Szegedy C, Zaremba W, Sutskever I, Bruna J, Erhan D, Goodfellow  
305 I, et al. Intriguing properties of neural networks. arXiv preprint  
306 arXiv:13126199. 2013;.
- 307 [17] Maguire EA, Gadian DG, Johnsrude IS, Good CD, Ashburner J, Frack-  
308 owiak RS, et al. Navigation-related structural change in the hippocampi  
309 of taxi drivers. *Proceedings of the National Academy of Sciences*.  
310 2000;97(8):4398–4403.

- 311 [18] Byrne JH, Heidelberger R, Waxham MN. From molecules to networks:  
312 an introduction to cellular and molecular neuroscience. Academic Press;  
313 2014.
- 314 [19] Laan A, Iglesias M, de Polavieja G. Opponent assessment and conflict  
315 resolution through mutual motor coordination. bioRxiv. 2017;p. 208918.
- 316 [20] Elsayed GF, Shankar S, Cheung B, Papernot N, Kurakin A, Goodfellow  
317 I, et al. Adversarial Examples that Fool both Human and Computer  
318 Vision. arXiv preprint arXiv:180208195. 2018;.
- 319 [21] Stevens M, Merilaita S. Animal camouflage: current issues and new per-  
320 spectives. *Philosophical Transactions of the Royal Society B: Biological*  
321 *Sciences*. 2009;364(1516):423–427.
- 322 [22] Enquist M, Ghirlanda S. *Neural networks and animal behavior*. Prince-  
323 ton University Press; 2013.
- 324 [23] Endler JA. Natural selection on color patterns in *Poecilia reticulata*.  
325 *Evolution*. 1980;34(1):76–91.
- 326 [24] Sherratt TN, Mesterton-Gibbons M. The evolution of respect for prop-  
327 erty. *Journal of evolutionary biology*. 2015;28(6):1185–1202.
